# Supplementary material
Source: Springer Nature journal article supplement (https://www.springermedizin.de/resource/supplementary/13012_2009_162_MOESM1_ESM.pdf/9629372)

**Context**

**CPG  
development**

**CPG  
implementation**

**Health  
outcome**

**Patient and public  
involvement program**

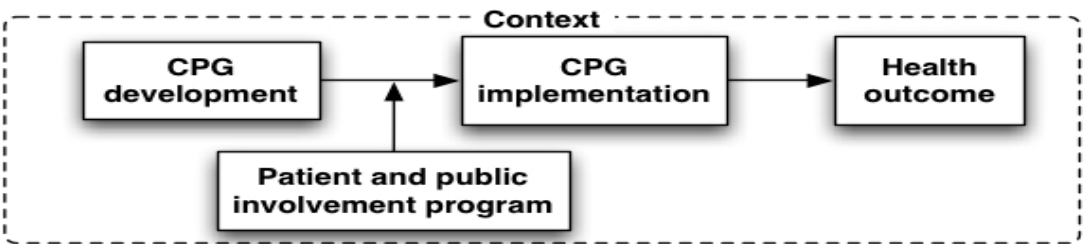

Supplement: MOESM1 [file 9629372]
